# Supplementary material
Source: MDPI journal article supplement (https://www.mdpi.com/2227-9717/8/11/1511)

Article

# Digital Twinning Process for Stirred Tank Reactors/Separation Unit Operations through Tandem Experimental/Computational Fluid Dynamics (CFD) Simulations

Blaž Oblak, Simon Babnik, Vivian Erklavec-Zajec, Blaž Likozar and Andrej Pohar \*

## Supplementary Materials

This Supplementary Materials contain: 8 Figures

A: Pitched mixer with baffles, 1 L

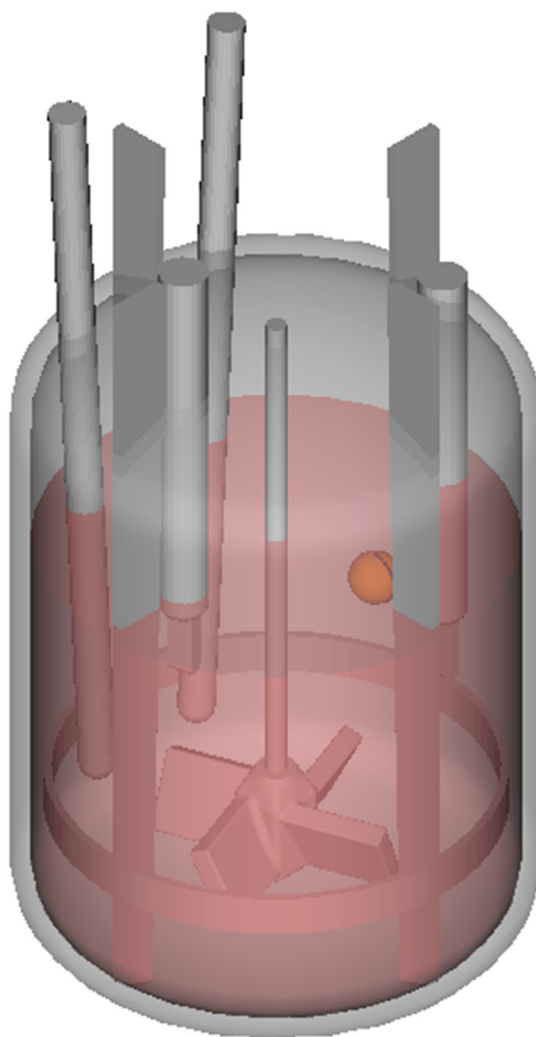

**B: Pitched mixer with baffles, 1.5 L**

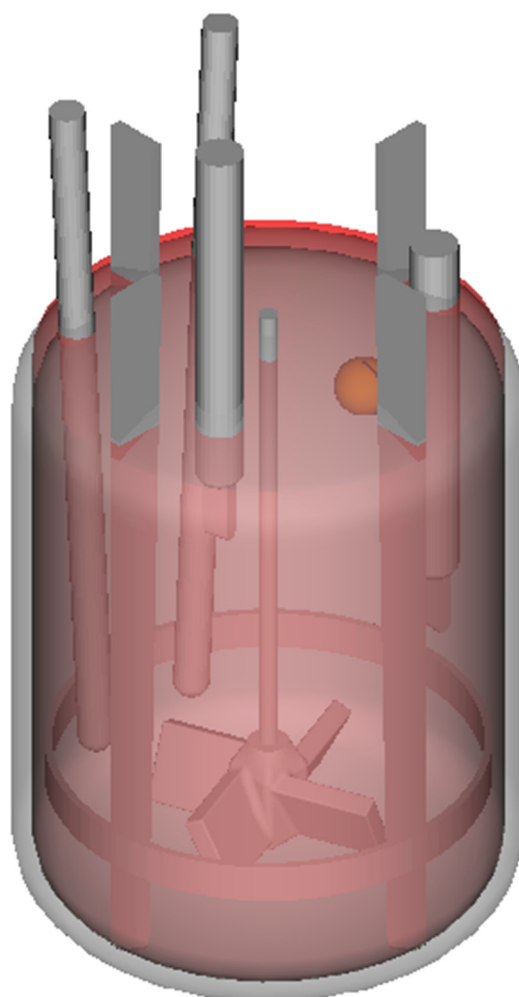

**C: Non-Pitch mixer without baffles, 1 L**

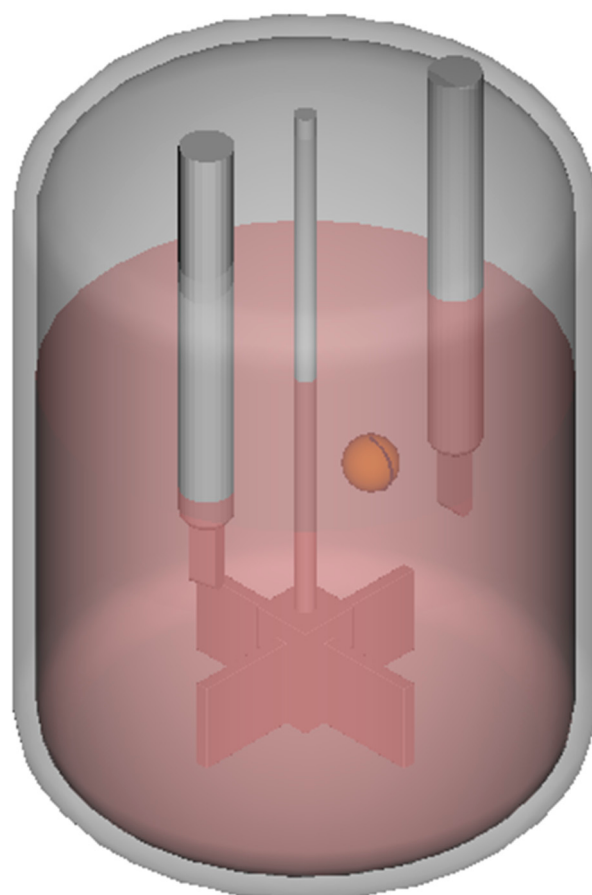

**D: Non-Pitch mixer without baffles, 1.5 L**

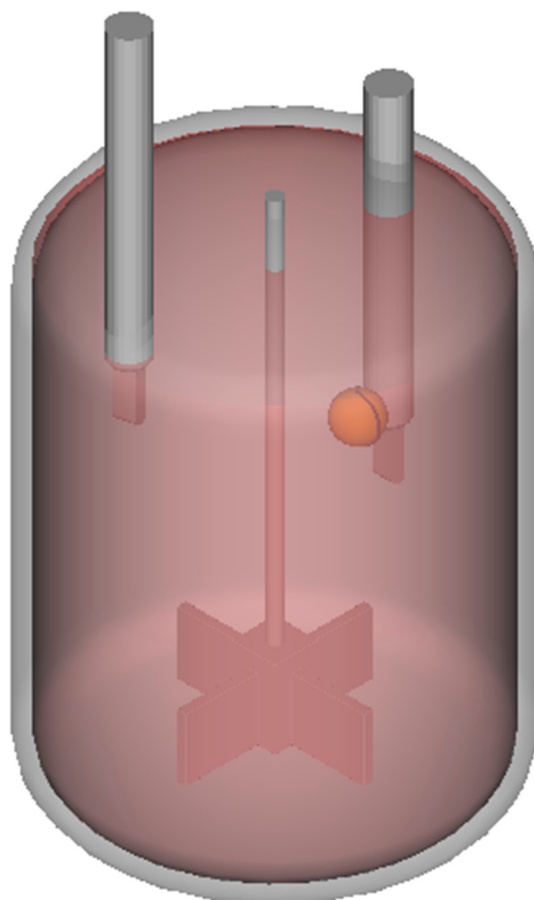

**E: Pitched mixer without baffles, 1 L**

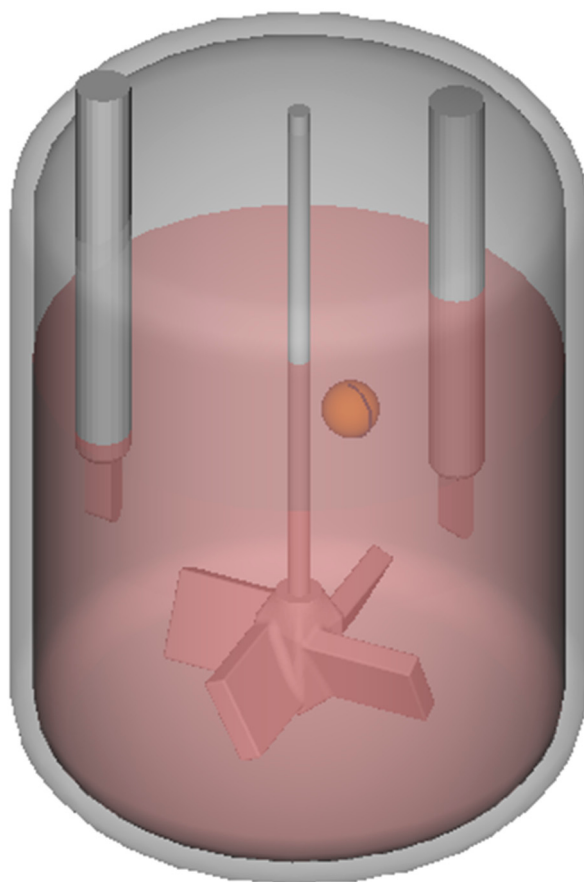

**F:** Pitched mixer without baffles, 1.5 L

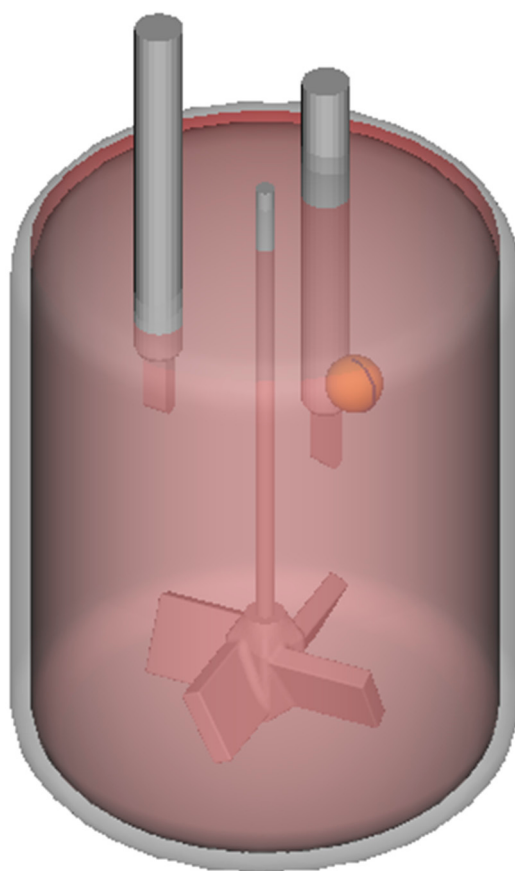

**G: Non-pitched mixer with baffles, 1 L**

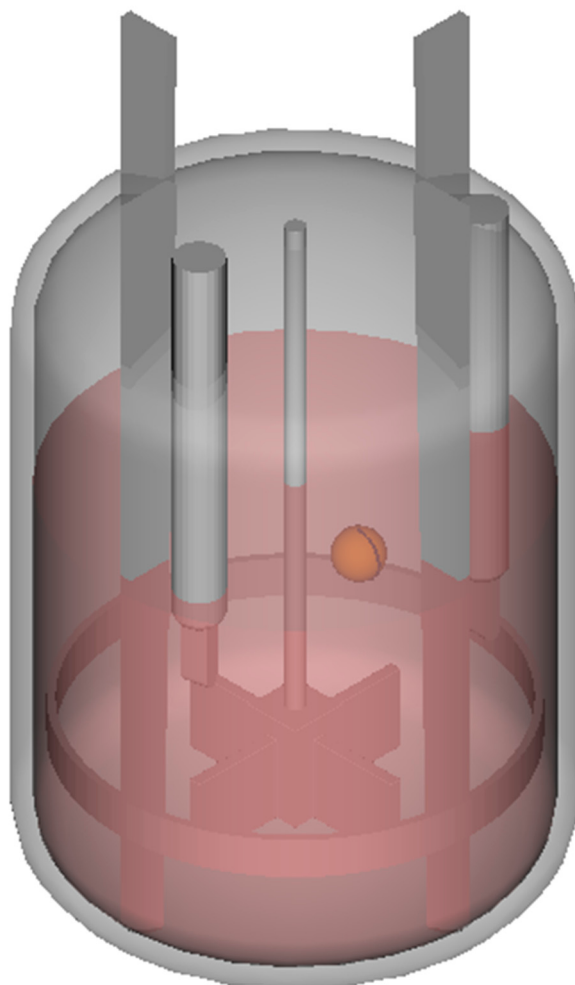

**H: Non-pitched mixer with baffles, 1.5 L**

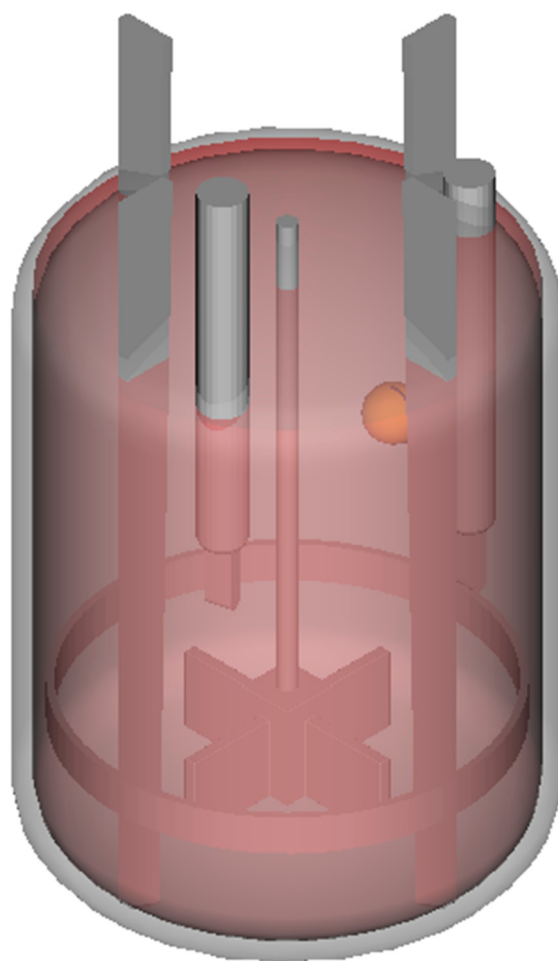

Supplement: s1 [file s1]
